# Supplementary material for: Overuse of antibiotics in the management of acute diarrhea in children under five years in four provinces of Mozambique (2014-2019)
Source: Research Square preprint supplement (doi:10.21203/rs.3.rs-4720196/v1), 2024-08-11
Supplement: Supplementary file 1 [file 0ac0e28fc8fc84bf17ab976e.xlsx]

## Sheet: Table 3
	Table 3: Antibiotic use by type within the years in children with diarrhea, May 2014-December 2019, Mozambique
	Antibiotic type	2014		2015		2016		2017		2018		2019
		n	%	n	%	n	%	n	%	n	%	n	%
	Ampicillin	28	36.8421	364	34.2427	144	24.2424	173	28.6899	165	36.2637	63	28.3784
	Gentamicin	12	15.7895	261	24.5532	112	18.8552	199	33.0017	144	31.6484	50	22.5225
	Cotrimoxazole	20	26.3158	227	21.3547	181	30.4714	108	17.9104	48	10.5495	34	15.3153
	Metronidazole	2	2.63158	78	7.33772	59	9.93266	35	5.80431	39	8.57143	12	5.40541
	Ceftriaxone	0	0	33	3.10442	57	9.59596	32	5.3068	16	3.51648	40	18.018
	Crystalline penicillin	4	5.26316	62	5.83255	14	2.3569	38	6.30182	26	5.71429	16	7.20721
	Amoxicilin	5	6.57895	25	2.35183	12	2.0202	9	1.49254	5	1.0989	1	0.45045
	Azithromycin	1	1.31579	2	0.188147	3	0.505051	2	0.331675	5	1.0989	5	2.25225
	Cloramphenicol	0	0	5	0.470367	8	1.3468	3	0.497512	1	0.21978	0	0
	Ciprofloxacin	3	3.94737	3	0.28222	2	0.3367	1	0.165837	1	0.21978	0	0
	Eriythromycin	0	0	2	0.188147	0	0	2	0.331675	2	0.43956	0	0
	Nalidix acid	0	0	1	0.0940734	0	0	1	0.165837	2	0.43956	0	0
	Phenoxymethylpenicilln	0	0	0	0	0	0	0	0	1	0.21978	1	0.45045
	Clavamox	1	1.31579	0	0	1	0.16835	0	0	0	0	0	0
	Cefaclor	0	0	0	0	1	0.16835	0	0	0	0	0	0
	Total	76	100	1063	100	594	100	603	100	455	100	222	100
